# Supplementary material for: The Intracellular Domain of Dumbfounded Affects Myoblast Fusion Efficiency and Interacts with Rolling Pebbles and Loner
Source: PLoS One. 2010 Feb 23;5(2):e9374. doi: 10.1371/journal.pone.0009374 (PMC2826419; doi:10.1371/journal.pone.0009374)
Supplement: Table S1 — Average number of nuclei in DA1 upon rescue of the duf, rst mutant (0.02 MB DOC) [file pone.0009374.s007.doc]

Table S1. Average number of nuclei in DA1 upon rescue of the *duf, rst* mutant

| Construct | Rescues *duf, rst* mutant | Avg. number of DA1 nuclei |
| --- | --- | --- |
| Duf TM DE-Cadh-flag | + | 9.78  0.91 |
| Duf TM Sema 1a-flag | + | 9.96  0.75 |
| Duf PDZ-flag | + | 8.43  1.43 |
| Duf PADVI-flag | + | 8.40  1.45 |
| Duf 2 phos-flag | + | 8.02  2.26 |
| Duf Tyr637-flag | + | 8.20  1.38 |
| Duf Ser680-flag | + | 7.90  1.41 |
| Duf Tyr810-flag | + | 8.25  1.29 |
| Duf Tyr814-flag | + | 8.00  1.36 |
| Duf CT4-flag | - | 1.78  1.13 (P<0.001) |
| Duf CT5-flag | - | 1.39  0.64 (P<0.001) |

DA1 nuclei in 45 embryonic hemisegments were counted in late stage 15 embryos. Average number of nuclei  standard deviation is shown. Symbols and abbreviations: + = rescues the *duf, rst* mutant comparable to WT, - = does not rescue the *duf, rst* mutant. Students t-test P<0.05 except where mentioned.
